# Supplementary material
Source: HighWire-hosted journal article supplement (https://jnm.snmjournals.org/highwire/filestream/95087/field_highwire_adjunct_files/0/178707_Supplemental_Data.pdf)
Supplement: 178707_Supplemental_Data.pdf [file 178707_Supplemental_Data.pdf]

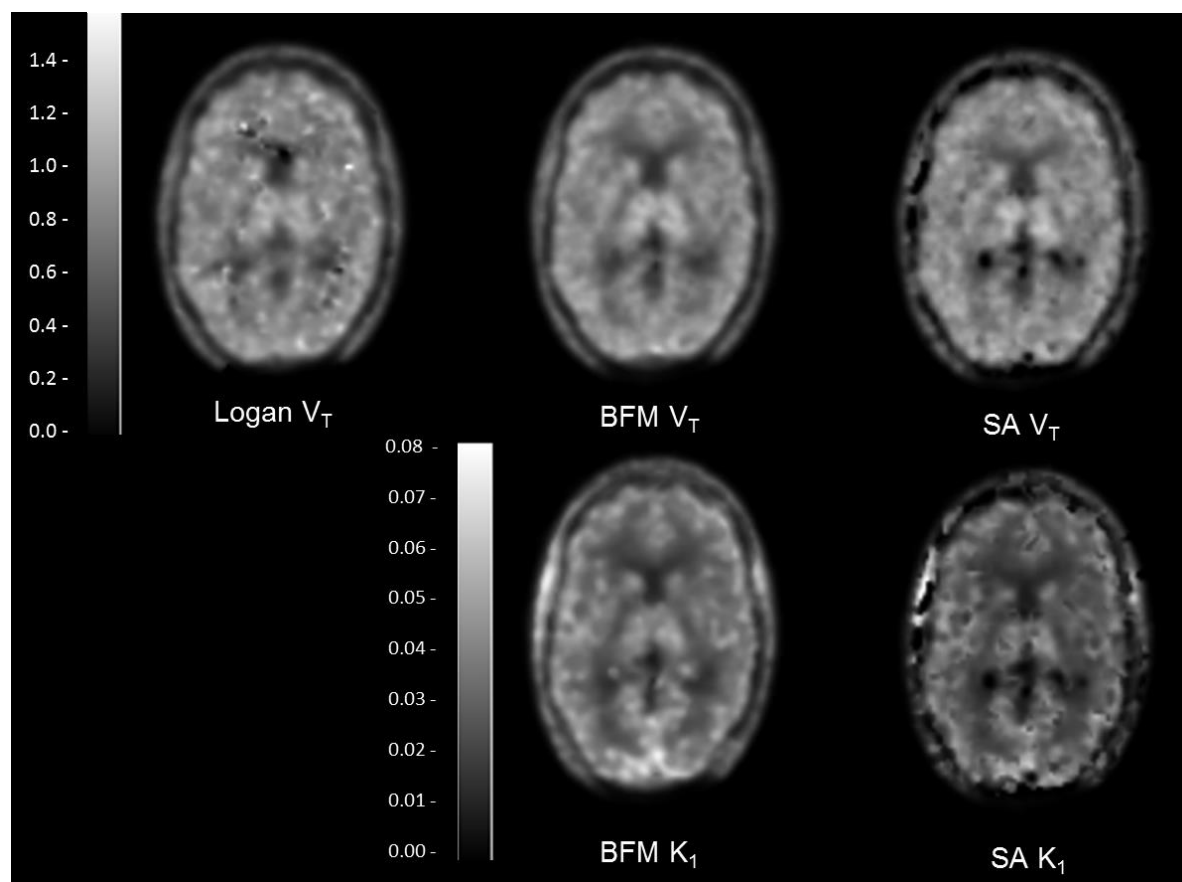

Supplemental Figure 1.

**A**

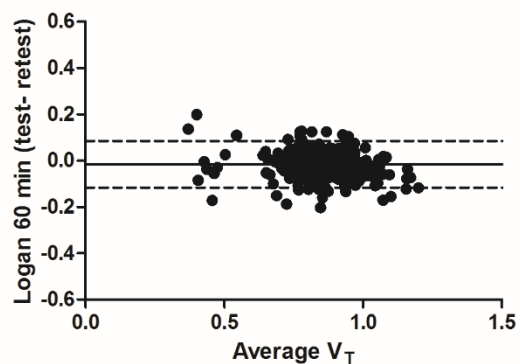

**B**

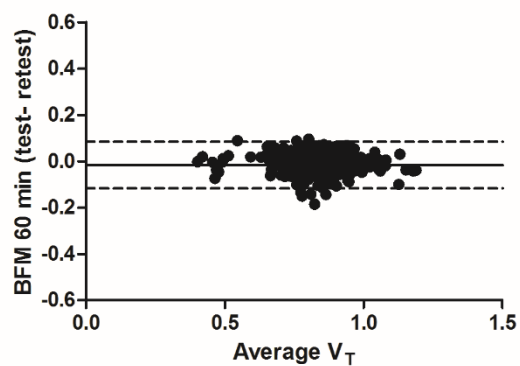

**C**

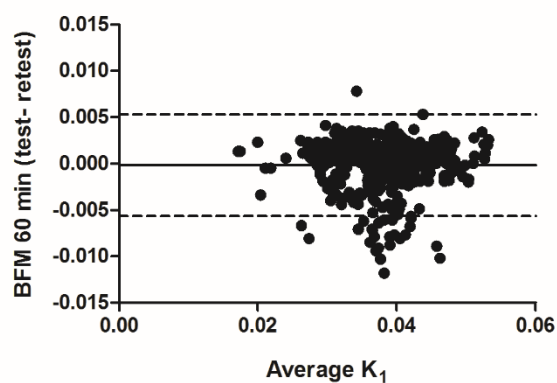

**D**

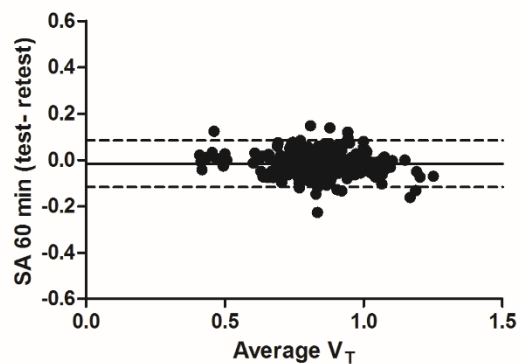

**E**

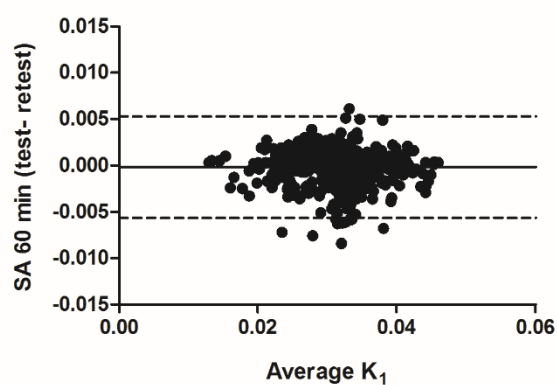

Supplemental Figure 2.

**A**

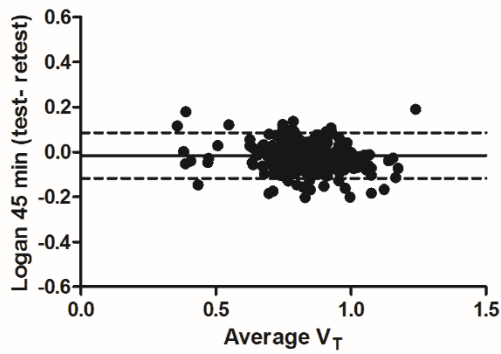

**B**

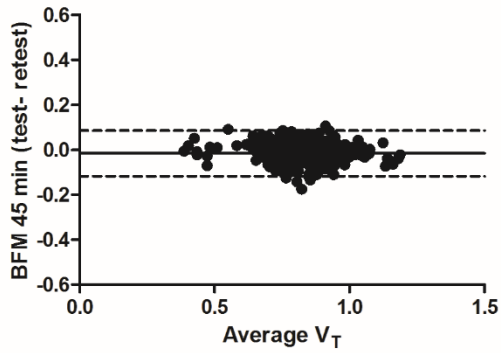

**C**

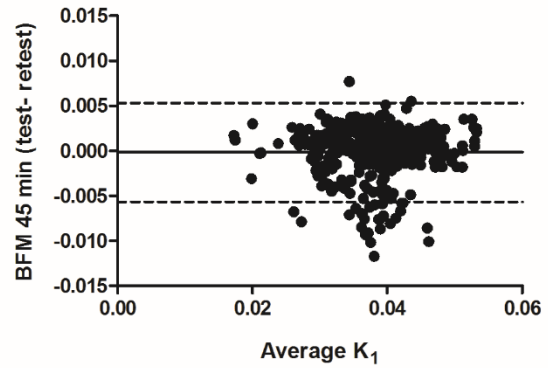

**D**

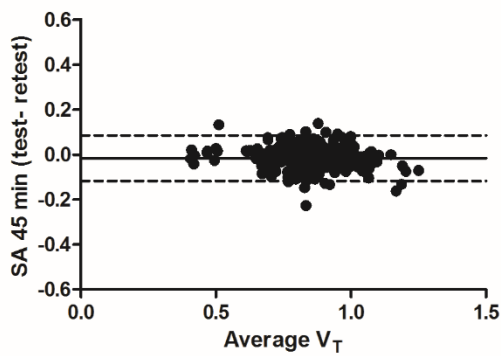

**E**

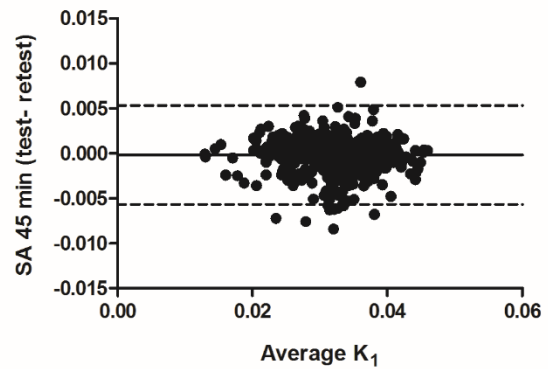

Supplemental Figure 3.

**A**

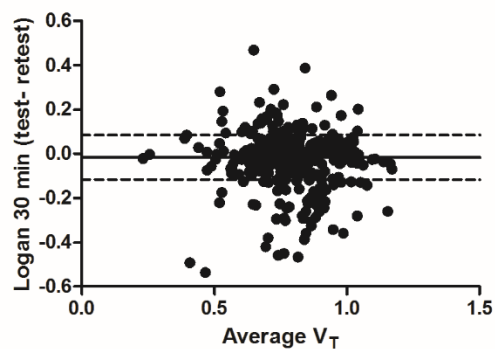

**B**

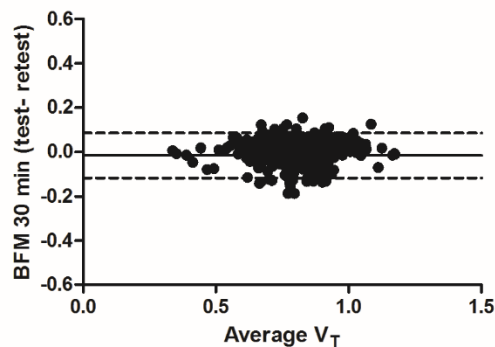

**C**

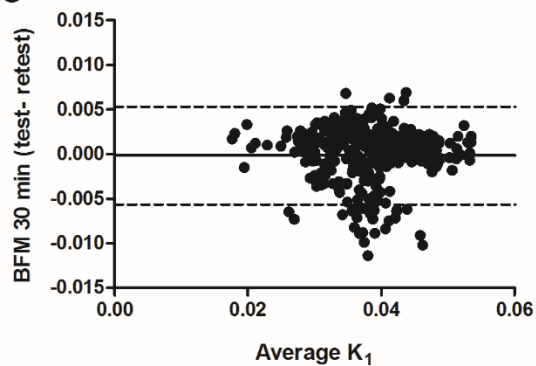

**D**

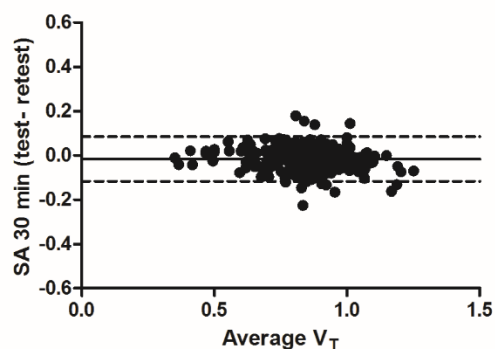

**E**

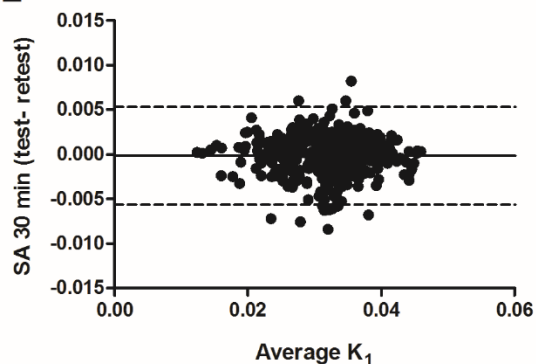

Supplemental Figure 4.
